# Supplementary material for: MicroRNAs and Drinking: Association between the Pre-miR-27a rs895819 Polymorphism and Alcohol Consumption in a Mediterranean Population
Source: PubMed Central journal article supplement (PMC5000735; doi:10.3390/ijms17081338), 2016-08-16
Supplement: ijms-17-01338-s001.pdf [file ijms-17-01338-s001.pdf]

# Supplementary Materials: MicroRNAs and Drinking: Association between the Pre-miR-27a rs895819 Polymorphism and Alcohol Consumption in a Mediterranean Population

Rocío Barragán, Oscar Coltell, Eva M. Asensio, Francesc Francés, José V. Sorlí, Ramon Estruch, Albert Salas-Huetos, Jose M. Ordovas and Dolores Corella

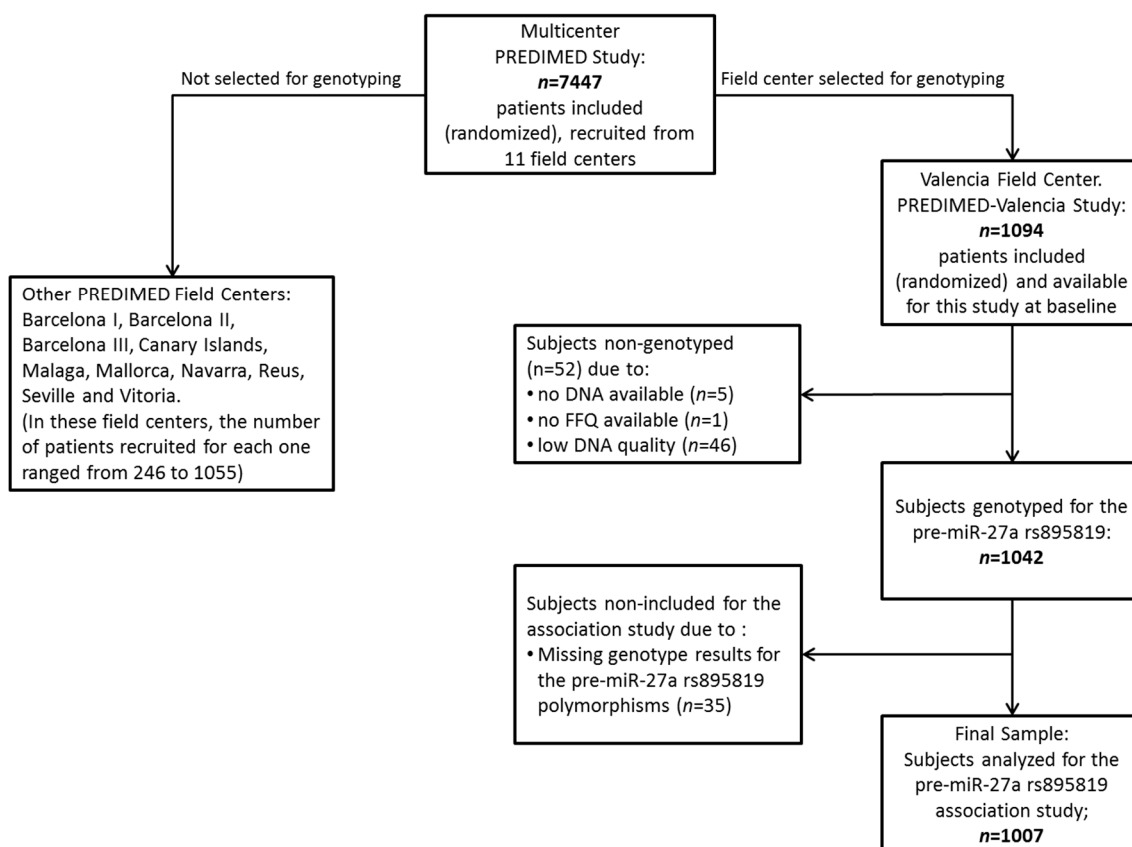

Figure S1. Flow-chart of the PREDIMED-Valencia Study.

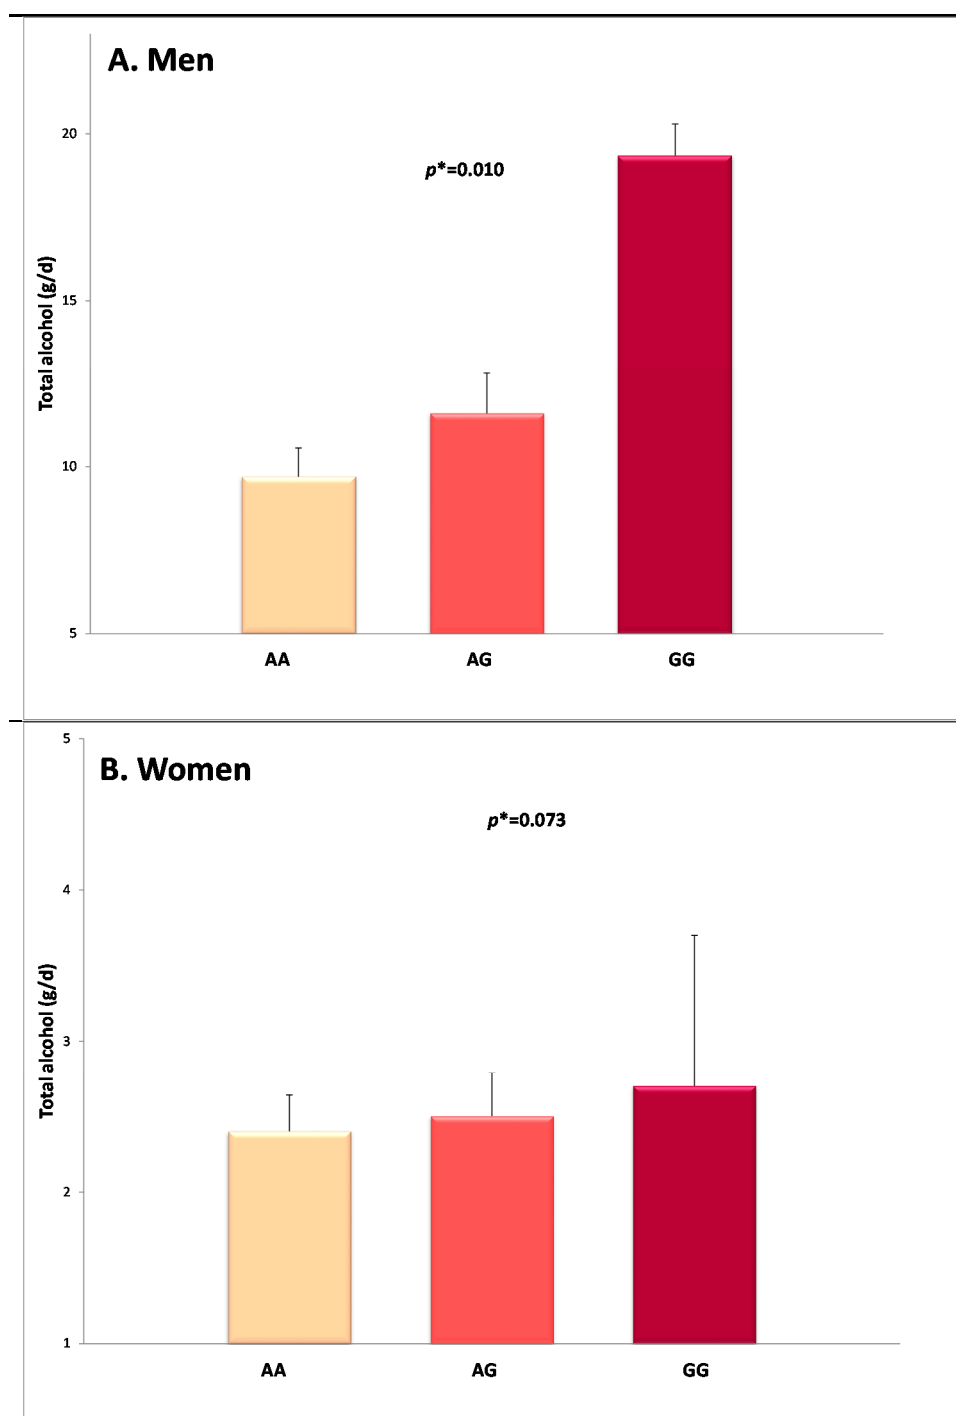

**Figure S2.** Total alcohol consumption (g/day) in men (A) and women (B). Means and standard errors (SE) of total alcohol intake (g/day), depending on the pre-miR-27a rs895819 polymorphism, are presented as untransformed variables ( $n = 368$  for men, and  $n = 639$  for women);  $p$ -values are calculated for the square root transformed variables;  $p^*$  indicates the  $p$ -value for linear trend (additive model for the SNP). When these models were adjusted for age, type-2 diabetes, obesity, hypertension, dyslipidemia, physical activity, smoking and total energy intake, the adjusted  $p$ -values were  $p_{\text{adj}} = 0.034$  for men, and  $p_{\text{adj}} = 0.292$  for women.

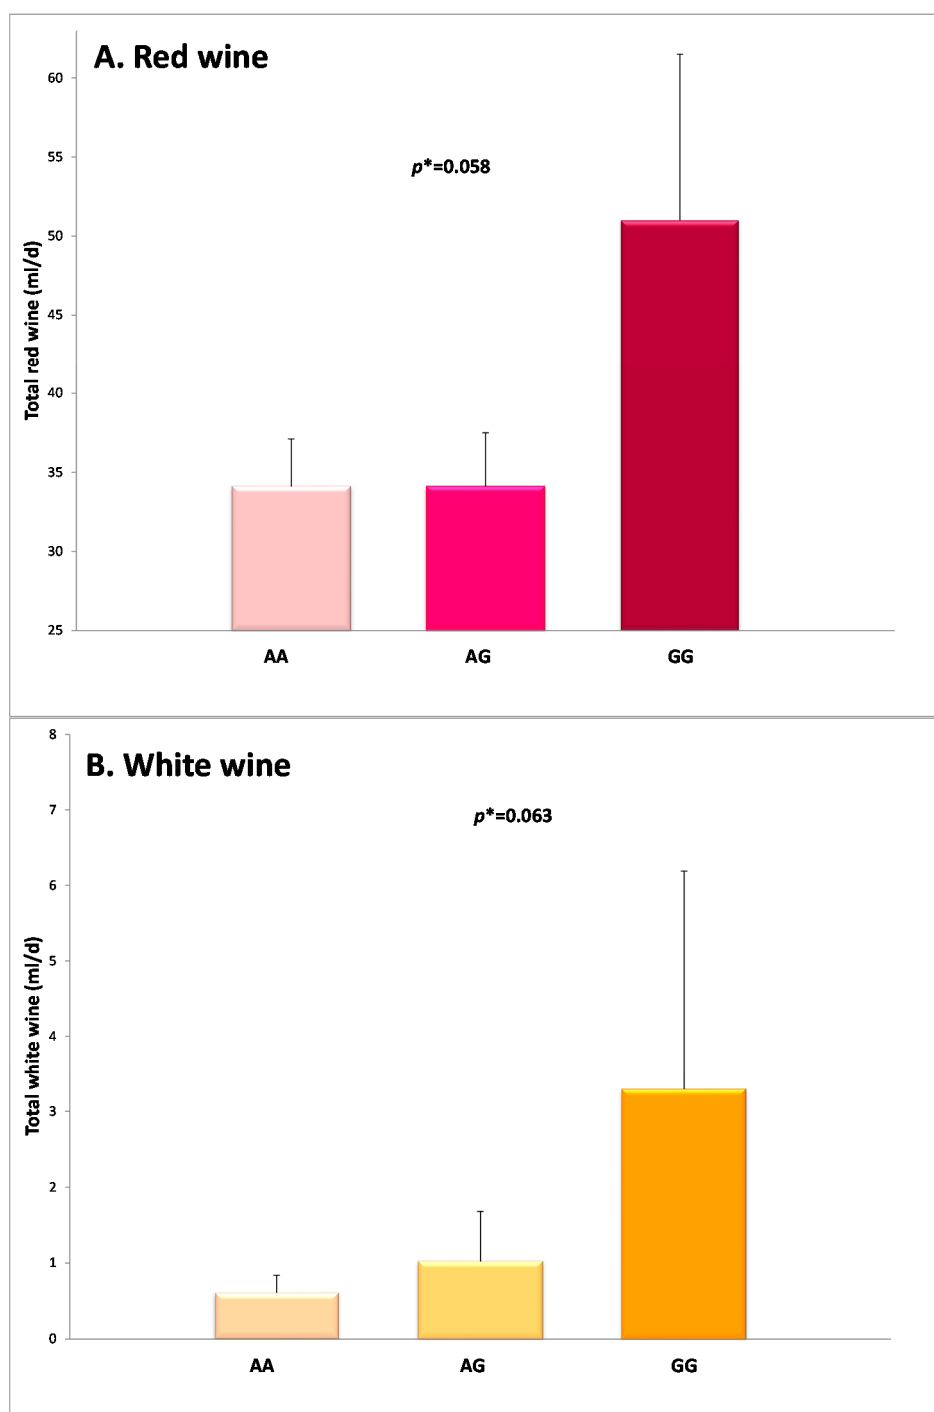

**Figure S3.** Consumption (mL/day) of red wine (**A**) and white wine (**B**) in both men and women. Means and standard errors (SE) of total consumption (mL/day) of red and white wine, depending on pre-miR-27a rs895819 polymorphism, are presented as untransformed variables ( $n = 1007$  participants).  $p$ -values are calculated for the square root transformed variables.  $p^*$  indicates the  $p$ -value for linear trend (additive model for the SNP). When these models were adjusted for age, type 2 diabetes, obesity, hypertension, dyslipidemia, physical activity, smoking and total energy intake, the adjusted  $p$ -values were  $p_{\text{adj}} = 0.165$  for men, and  $p_{\text{adj}} = 0.210$  for women.

**Table S1.** Association between liver enzymes and mean corpuscular volume with alcohol consumption <sup>1,2</sup>.

| Liver Enzymes and Mean Corpuscular Volume <sup>3</sup> | Total (n = 749) | Non-Drinker (n = 329) | Moderate Drinker (n = 371) | High Drinker (n = 49) | <i>p</i> <sup>4</sup> | <i>p</i> <sup>5</sup> |
|--------------------------------------------------------|-----------------|-----------------------|----------------------------|-----------------------|-----------------------|-----------------------|
| AST (U/L) (n = 672)                                    | 21.86 (0.34)    | 21.60 (0.54)          | 21.99 (0.45)               | 22.80 (1.66)          | 0.424                 | 0.793                 |
| ALT (U/L) (n = 749)                                    | 24.10 (0.45)    | 23.17 (0.63)          | 24.70 (0.69)               | 26.10 (1.46)          | 0.122                 | 0.536                 |
| GGT (U/L) (n = 521)                                    | 28.07 (0.96)    | 25.23 (1.96)          | 29.69 (1.51)               | 22.78 (3.40)          | 0.052                 | 0.288                 |
| MCV (fL/RBC) (n = 567)                                 | 89.48 (0.21)    | 88.80 (0.32)          | 89.70 (0.31)               | 92.01 (0.87)          | 0.001                 | 0.045                 |

<sup>1</sup>: Values are expressed as mean (standard error); <sup>2</sup>: Non-drinker: 0 g/day; Moderate drinker: ≤26.4 g/day for men and ≤13.2 g/day for women; High drinker: >26.4 g/day for men and >13.2 g/day for women; <sup>3</sup>: *n* values are the number of subjects having almost one liver enzyme determination (*n* = 749 for ALT). For the other parameters, the corresponding *n* has been indicated between brackets; <sup>4</sup>: *p* Unadjusted *p*-value obtained in the ANOVA test for linear trend; <sup>5</sup>: *p* Adjusted *p*-value for sex and age in the multivariable GML; AST: aspartate aminotransferase (old GOT); ALT: alanine aminotransferase (old GPT); GGT: gamma glutamyl transferase; and MCV: mean corpuscular volume. AST, ALT and GGT are expressed in units of enzymatic activity (the amount of enzyme that catalyzes the conversion of 1 micro mole of substrate per minute) in a volume of 1 liter. MCV is expressed in femtoLiters per Red Blood Cell size.
